Figure S1(A)

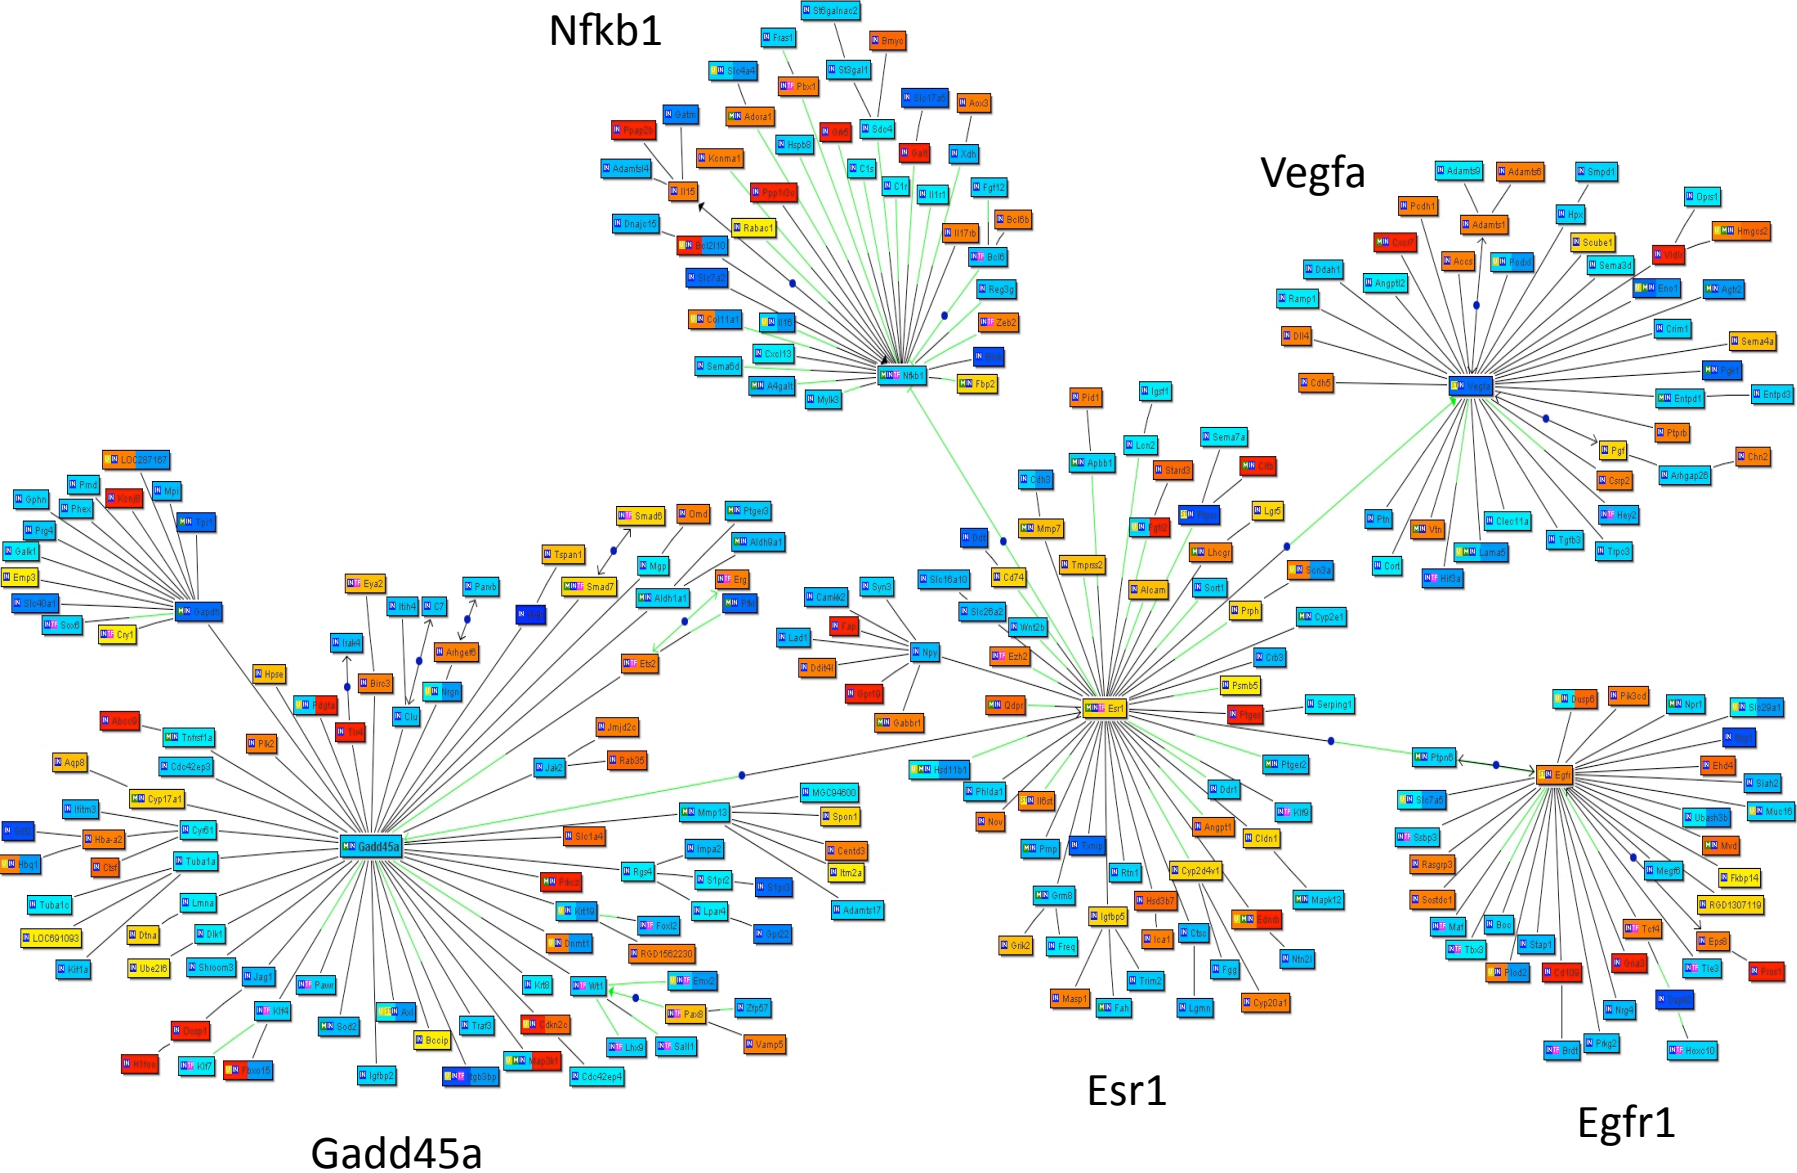

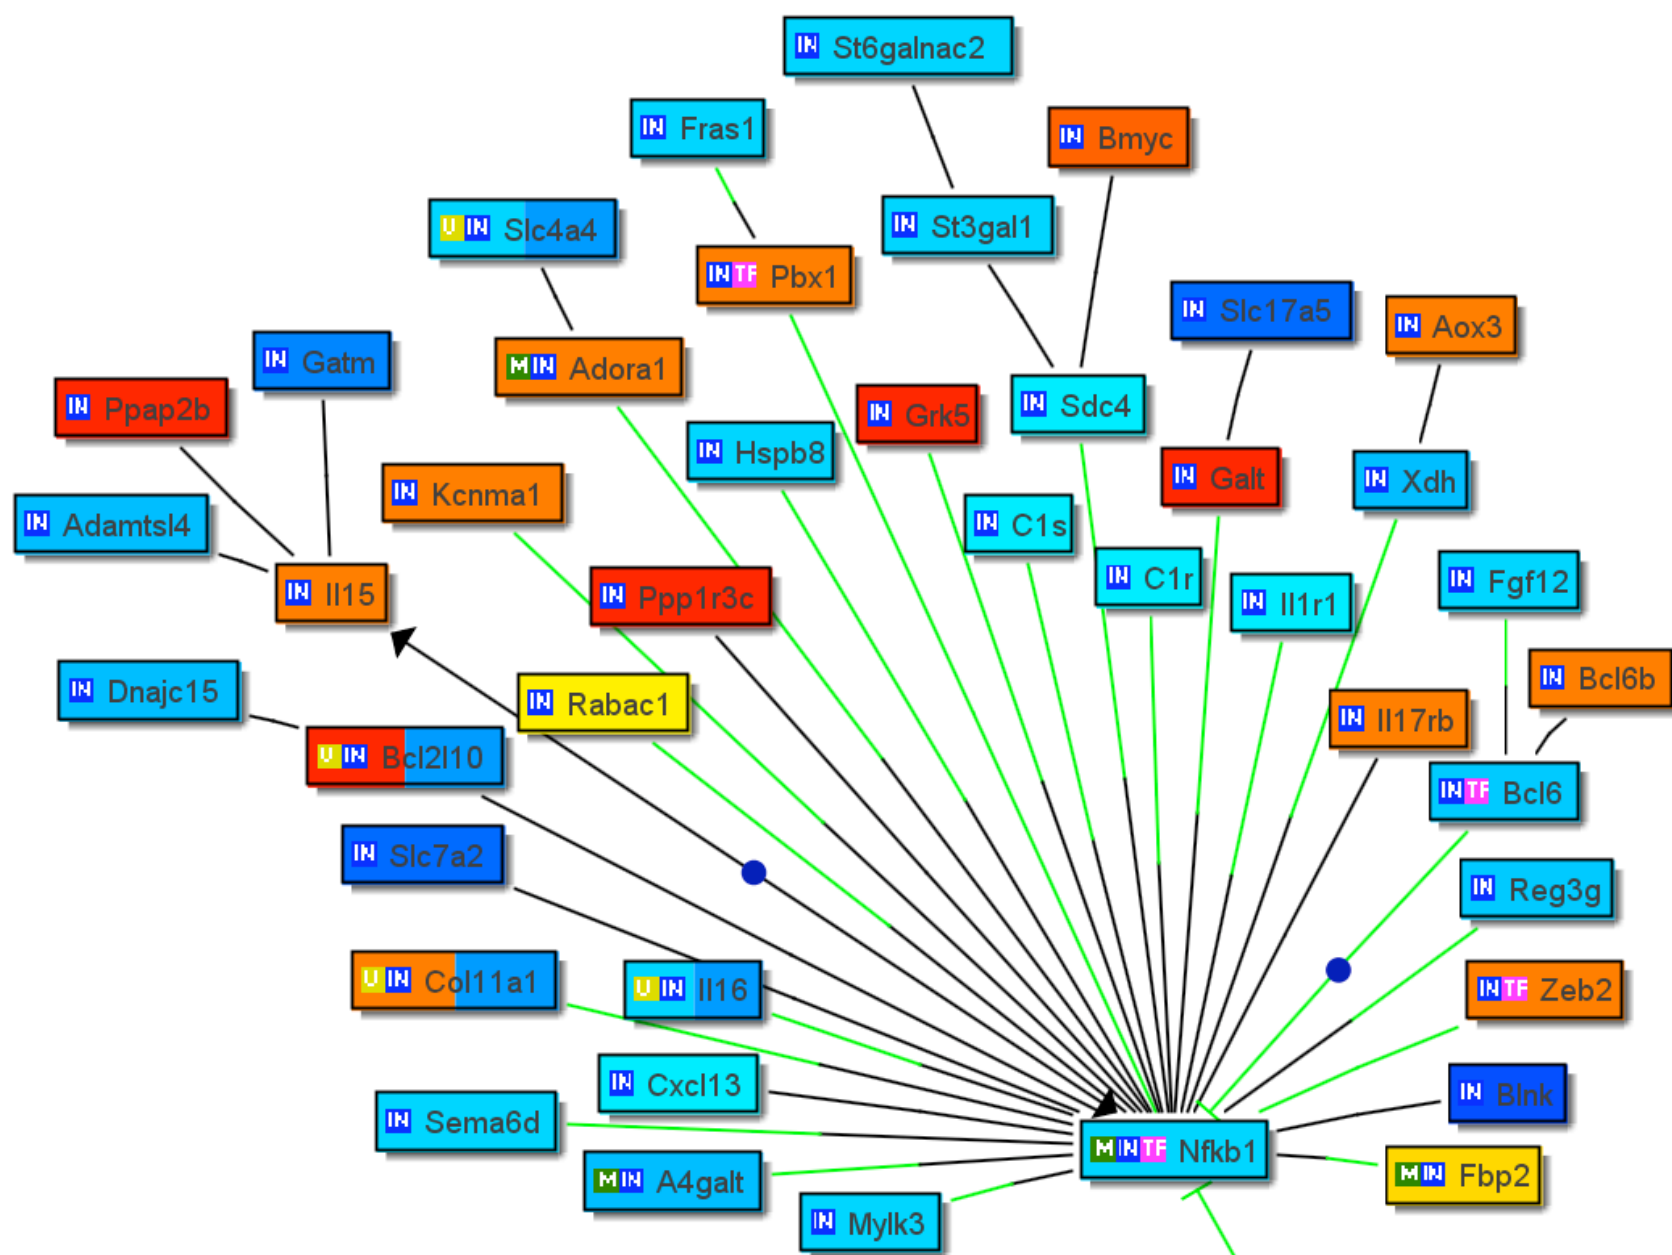

Figure S1(C)

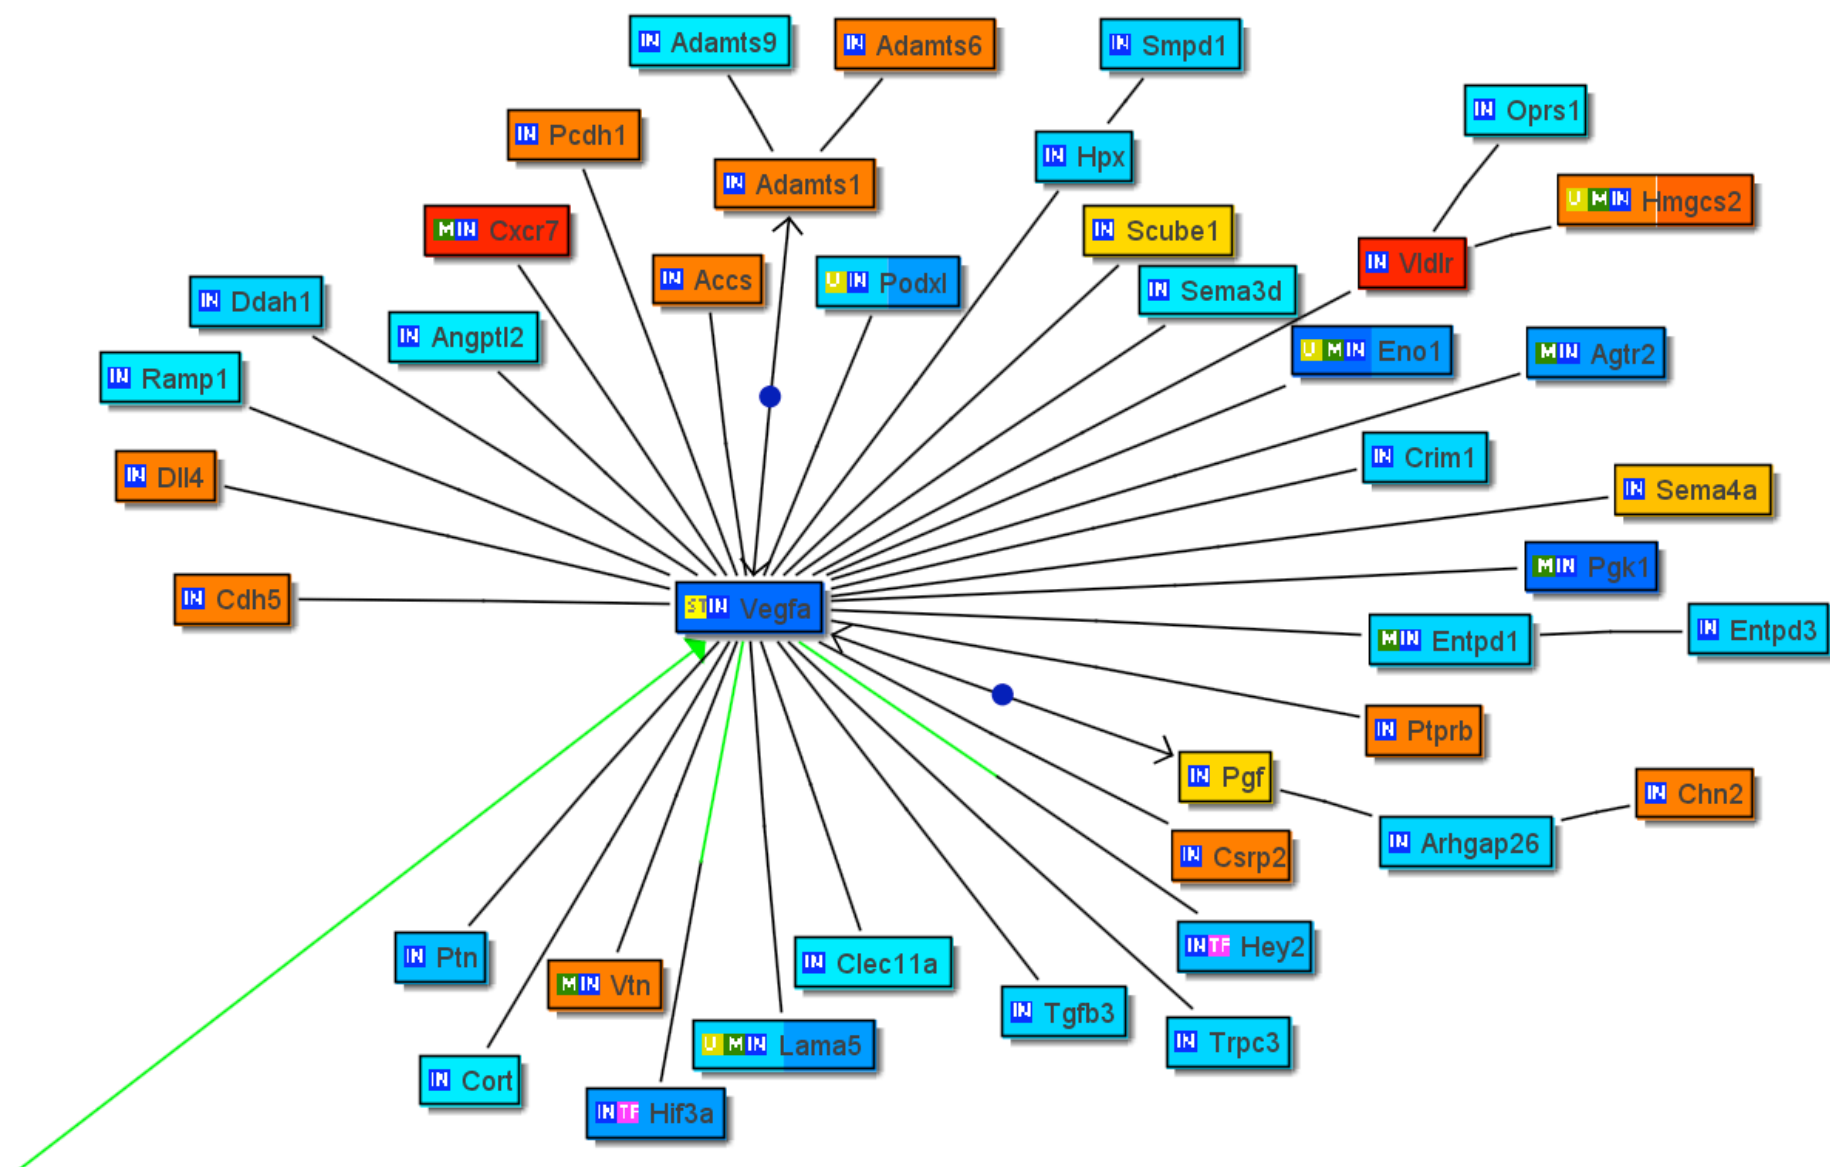

Figure S1(D)

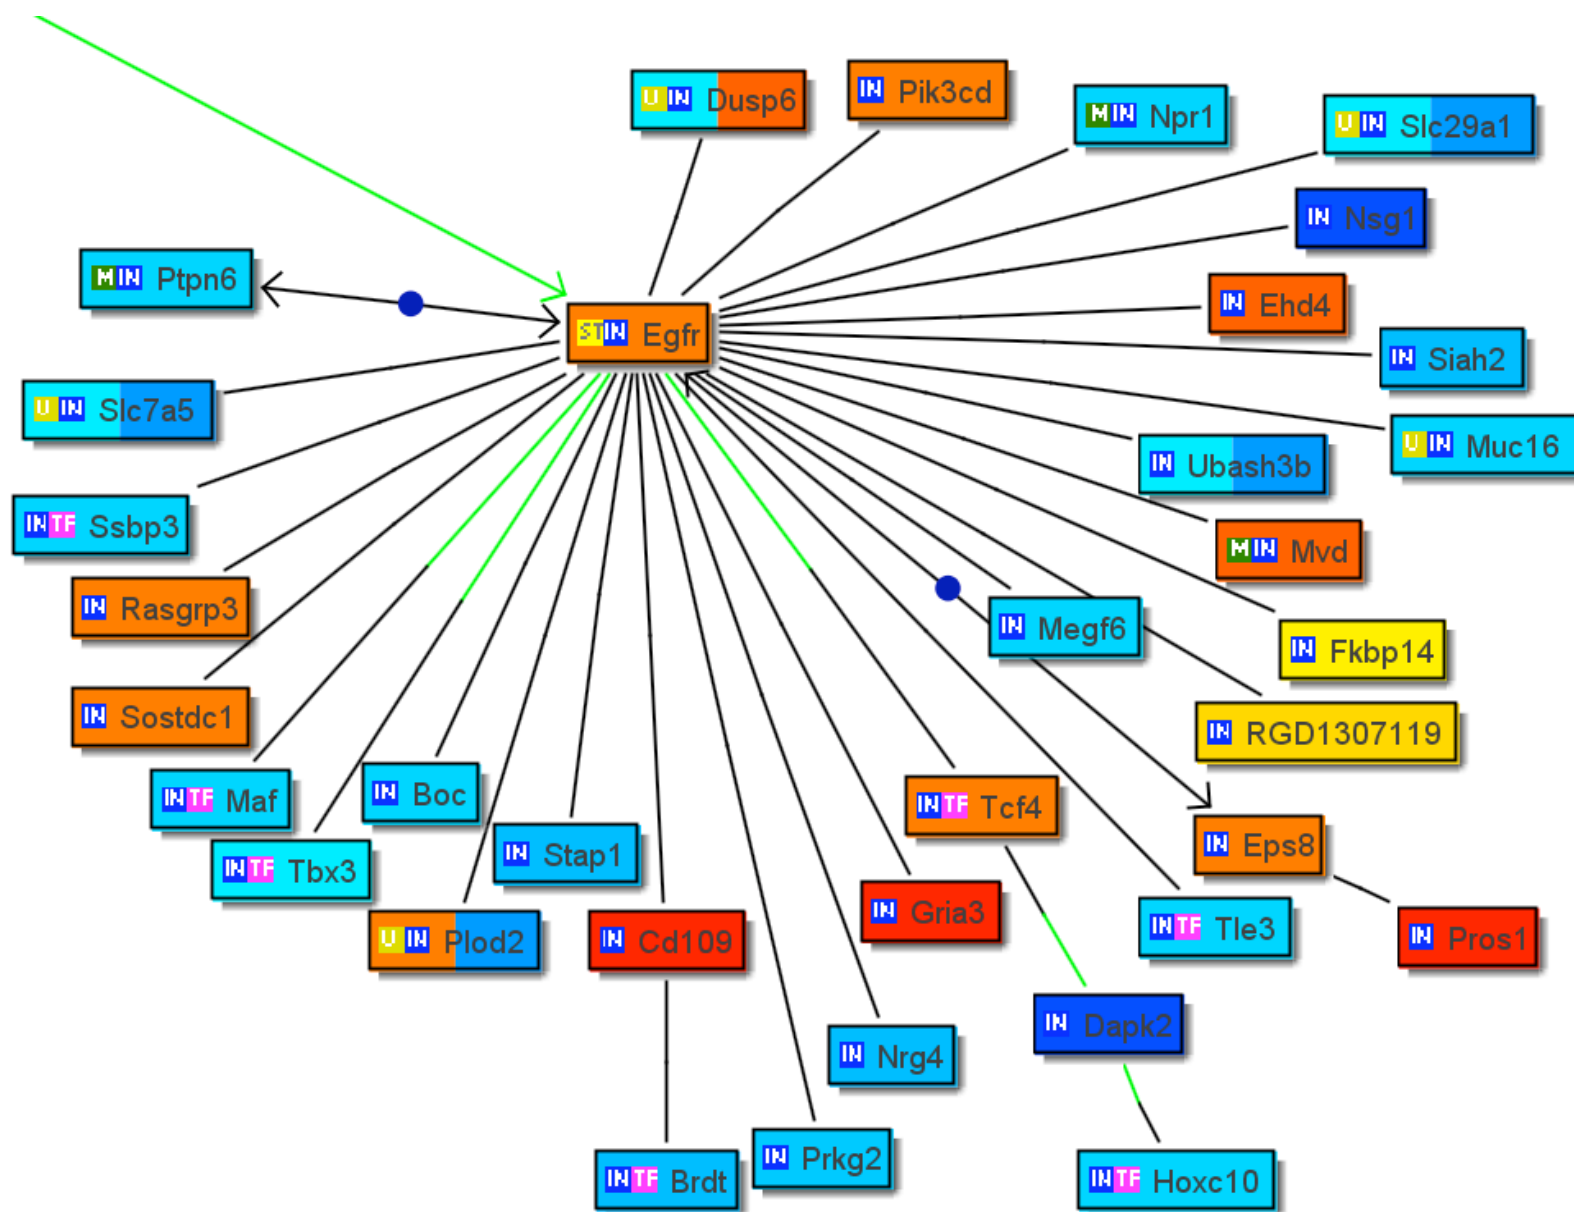

Figure S1(E)

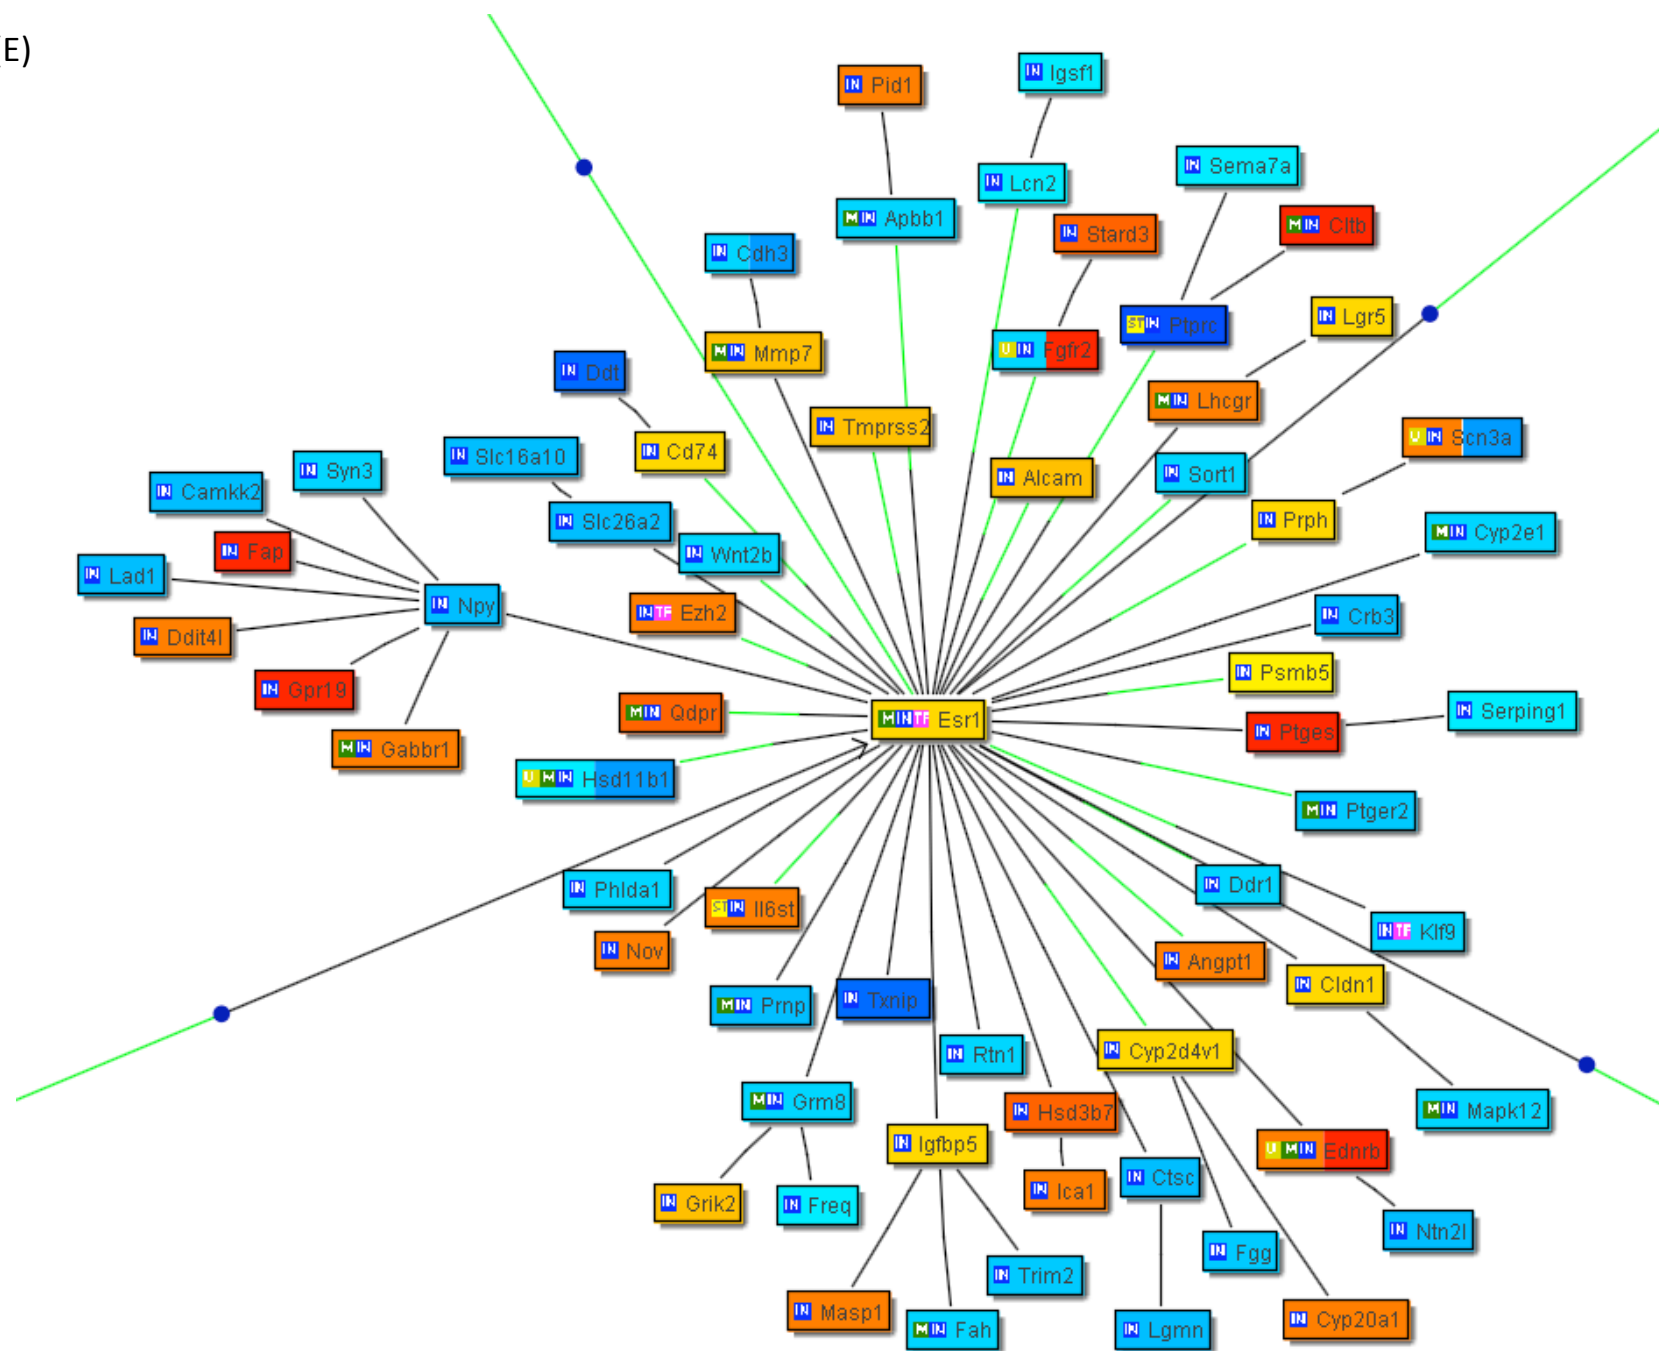

Figure S1(F)

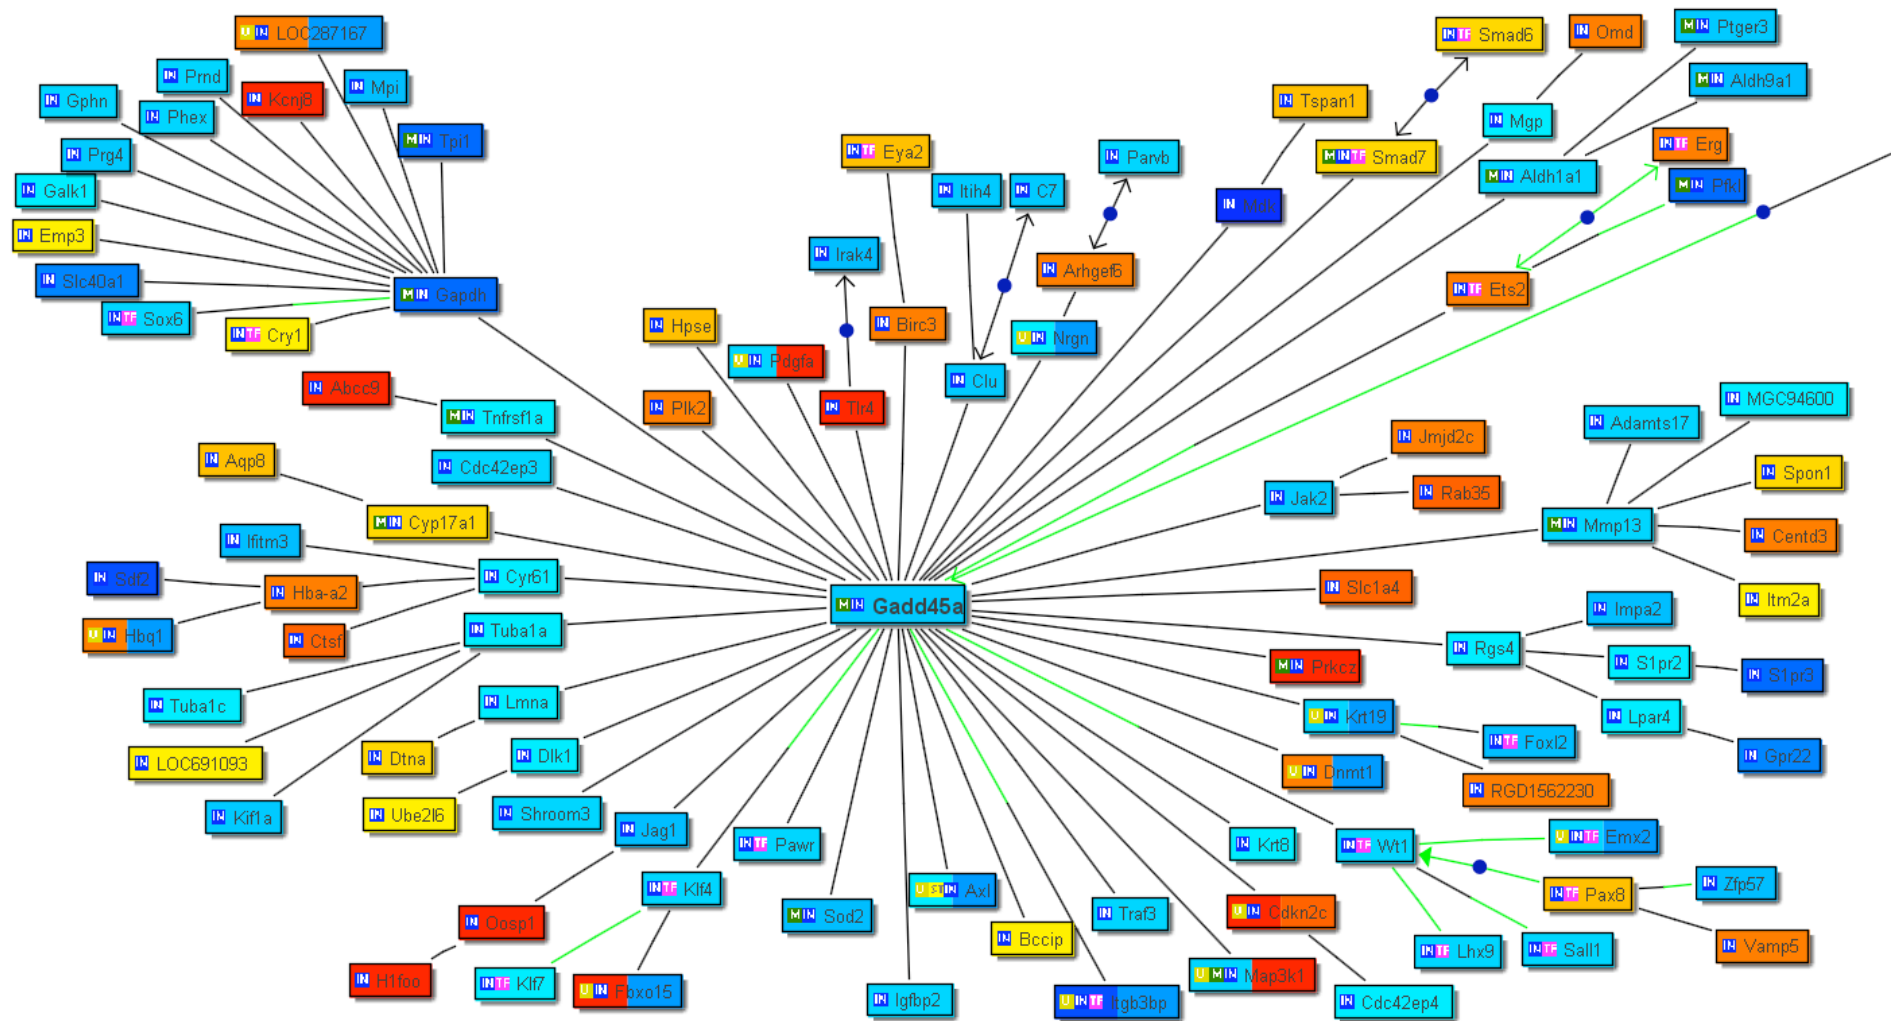

Source: https://geomar-search.kobv.de/redirect.do?ind=8&index=crossrefExt&plv=2&target=crossref_info%3Adoi%2F10.1371%252Fjournal.pone.0011637
